# Supplementary material for: Adipocyte-Specific ACKR3 Regulates Lipid Levels in Adipose Tissue
Source: PubMed Central journal article supplement (PMC8067615; doi:10.3390/biomedicines9040394), 2021-04-06
Supplement: biomedicines-09-00394-s001.pdf [file biomedicines-09-00394-s001.pdf]

# Figure S1. Validation of *Ackr3* deficiency

**a**

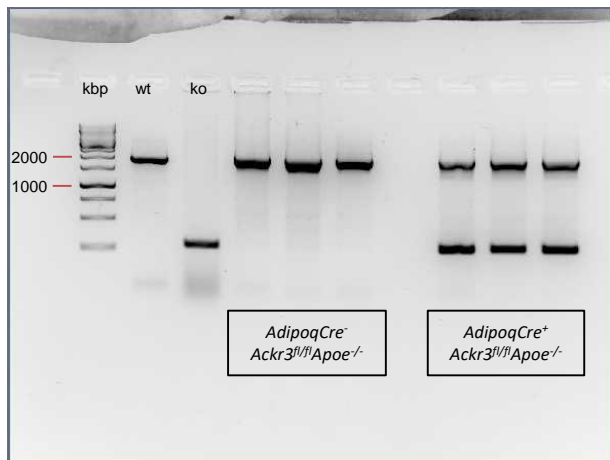

**b**

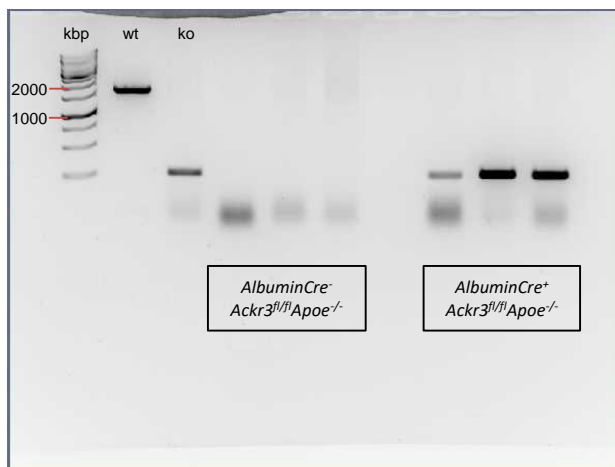

Supplementary Information

**Figure S2.** Full-length western blot images of Figure 3d.

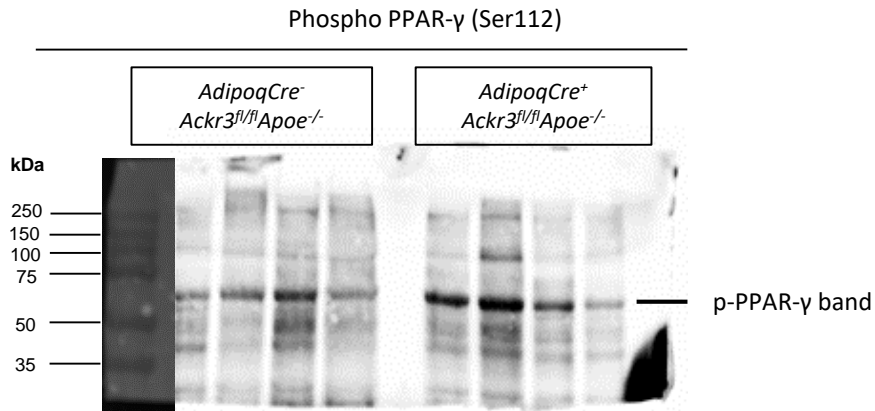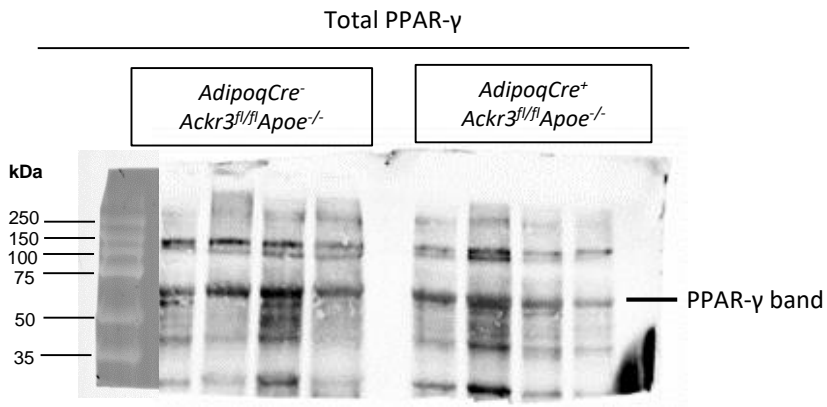

**Supplementary Information**
